# Supplementary material
Source: PubMed Central journal article supplement (PMC1224658)

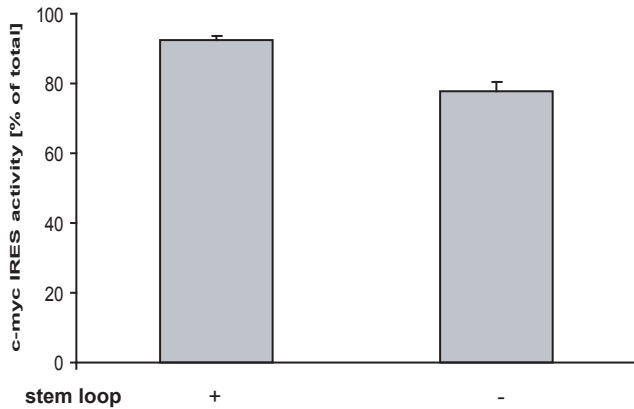

Supplement: pnas_0506536102_1.pdf [file pnas_0506536102_1.pdf]

**A**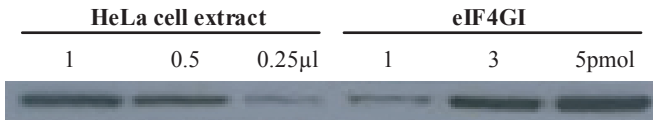**B**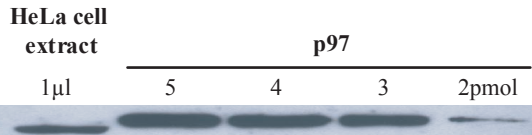

Supplement: pnas_0506536102_2.pdf [file pnas_0506536102_2.pdf]

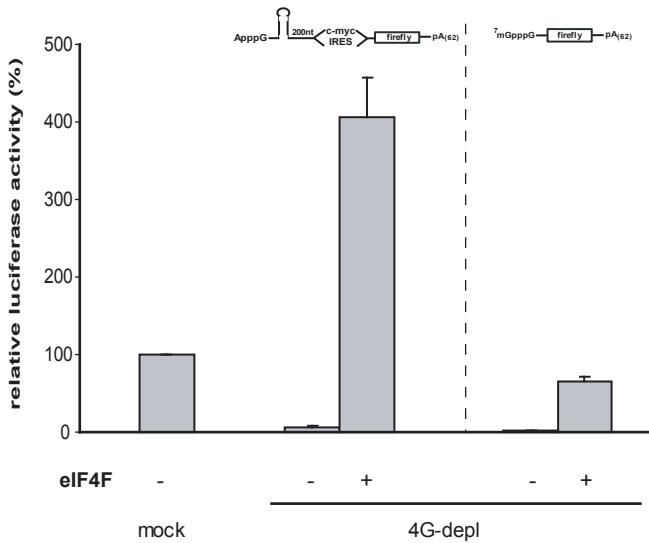

Supplement: pnas_0506536102_3.pdf [file pnas_0506536102_3.pdf]

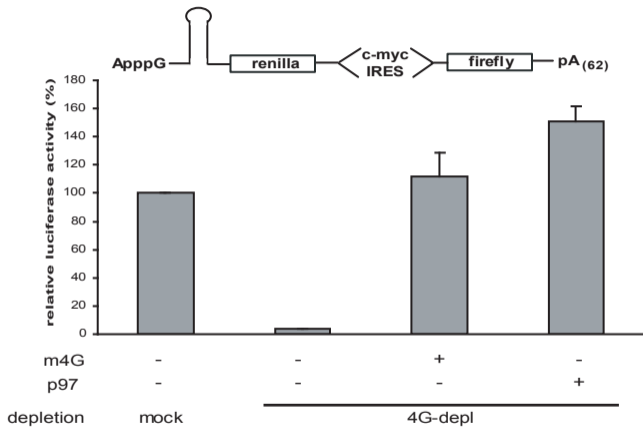

Supplement: pnas_0506536102_4.pdf [file pnas_0506536102_4.pdf]

**A**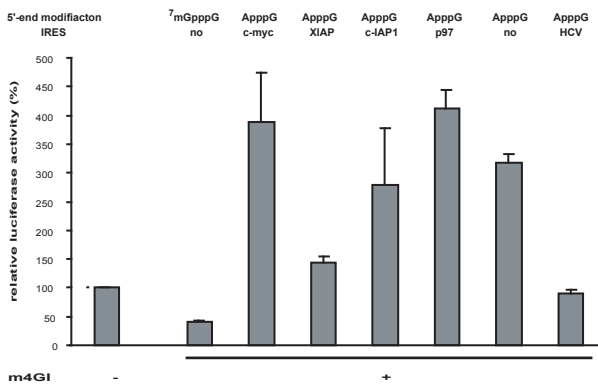**B**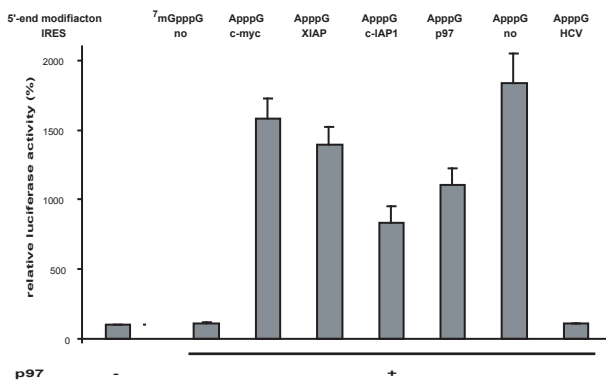

Supplement: pnas_0506536102_5.pdf [file pnas_0506536102_5.pdf]

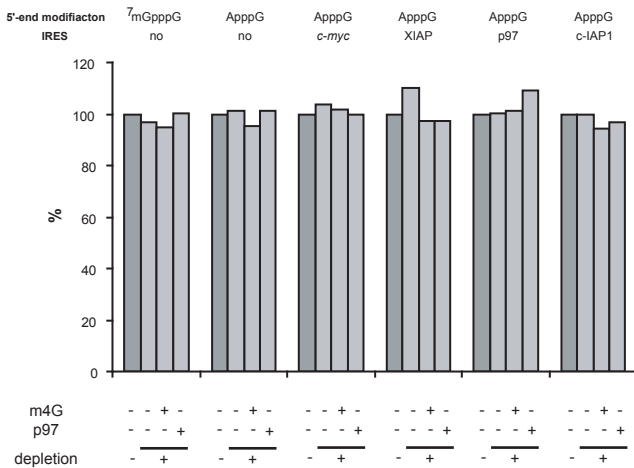

Supplement: pnas_0506536102_6.pdf [file pnas_0506536102_6.pdf]

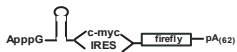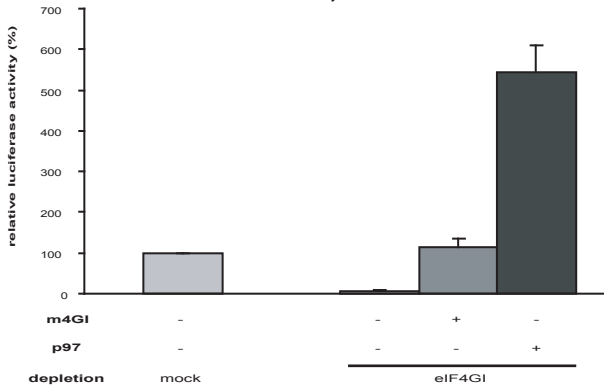

Supplement: pnas_0506536102_7.pdf [file pnas_0506536102_7.pdf]
